# Supplementary material for: Giant odd-parity magnetoresistance from proximity-induced topological states
Source: Research Square preprint supplement (doi:10.21203/rs.3.rs-6911783/v1), 2025-08-13
Supplement: Supplementary file 1 [file ad73065408cdbe4e943202ae.pdf]

## Supplementary Information

### Giant odd-parity magnetoresistance from proximity-induced topological states

Tomoki Hotta<sup>1</sup>, Le Duc Anh<sup>1,2\*</sup>, Takahiro Chiba<sup>3,4</sup>, Yohei Kota<sup>5</sup>,  
and Masaaki Tanaka<sup>1,2,6\*</sup>

<sup>1</sup>*Department of Electrical Engineering and Information Systems, The University of Tokyo*

<sup>2</sup>*Center for Spintronics Research Network (CSRN), The University of Tokyo*

<sup>3</sup>*Department of Information Science and Technology, Graduate School of Science and Engineering, Yamagata University, Japan*

<sup>4</sup>*Department of Applied Physics, Graduate School of Engineering, Tohoku University*

<sup>5</sup>*National Institute of Technology, Fukushima College*

<sup>6</sup>*Institute for Nano Quantum Information Electronics (NanoQuine)*

## Supplementary Table and Figures

**Supplementary Table S1** | Comparison of the OMR values, defined as  $[R(B) - R(-B)] / [2 \times R(0 \text{ T})]$ , reported so far.

| Material                                                         | Maximum OMR (%) | $B$ (T)  | Reference        |
|------------------------------------------------------------------|-----------------|----------|------------------|
| Eu <sub>2</sub> Ir <sub>2</sub> O <sub>7</sub>                   | 0.4%            | 9        | [S1]             |
| SmCo <sub>5</sub>                                                | 0.05%           | 0.5      | [S2]             |
| InAs/(Ga,Fe)Sb                                                   | 13.5%           | 10       | [S3]             |
| bilayer graphene/Cr <sub>2</sub> Ge <sub>2</sub> Te <sub>6</sub> | 40%             | 14       | [S4]             |
| $\alpha$ -Sn/(In,Fe)Sb                                           | <b>1150%</b>    | <b>1</b> | <b>This work</b> |

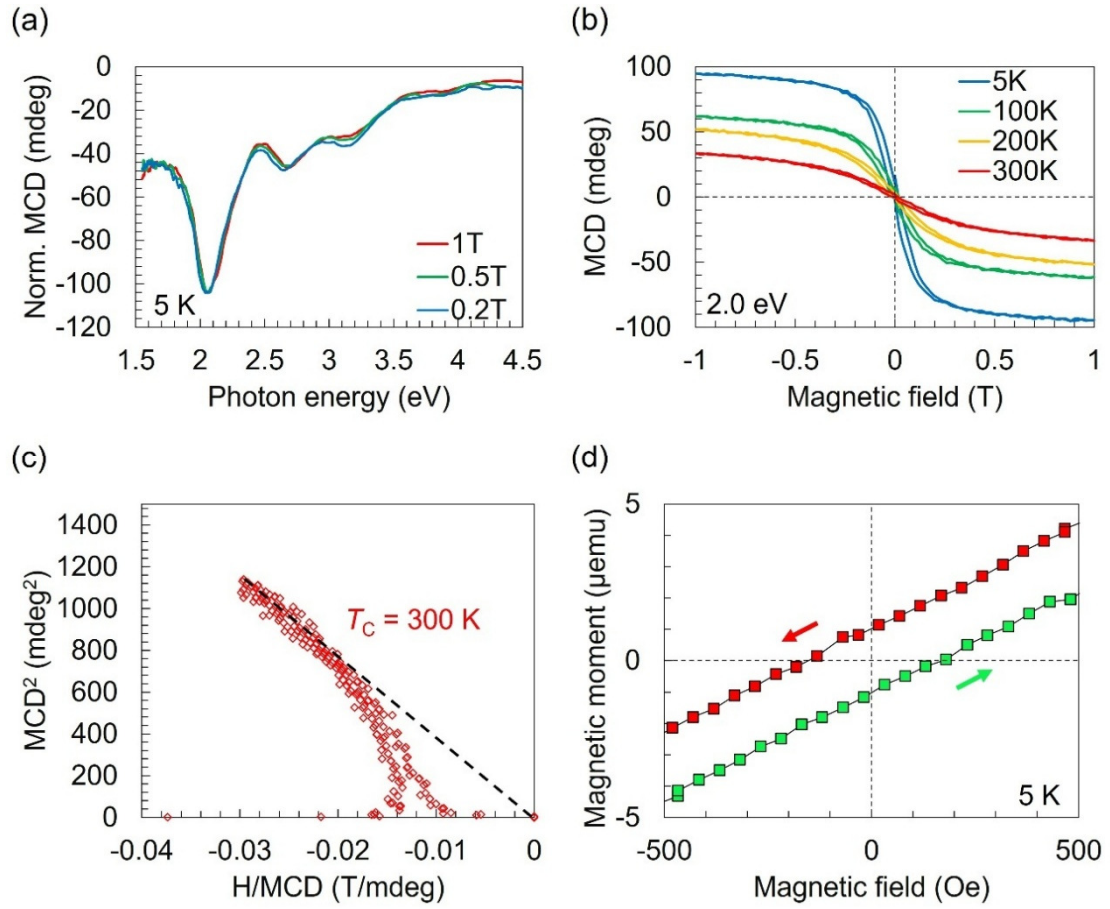

**Supplementary Fig. S1 | Magnetic properties of the (In,Fe)Sb layer.** (a) Reflection magnetic circular dichroism (MCD) spectra measured at 5 K under various perpendicular magnetic fields. MCD intensities at 0.5 T and 0.2 T are normalized to the spectrum at 1 T. (b) MCD intensity – magnetic field ( $MCD - H$ ) curves measured at various temperatures. The MCD intensity was at taken at 2.0 eV. (c) Arrott plot derived from the  $MCD - H$  curve at 300 K, used to estimate the Curie temperature. (d) Magnetization – magnetic field ( $M - H$ ) curve measured by SQUID magnetometry at 5 K.

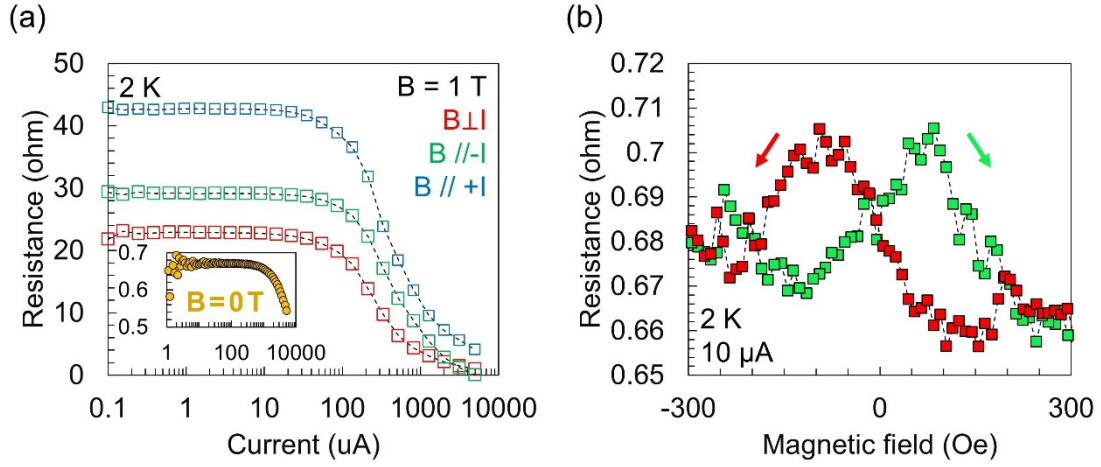

**Supplementary Fig. S2 | Current and magnetic field dependences of the longitudinal resistance at 2 K.** (a) Current dependence of the longitudinal resistance measured at 2 K. Red, green, and blue data points correspond to the measurements under a 1 T magnetic field applied perpendicular to the film plane ( $B \perp I$ ), oriented antiparallel ( $B // -I$ ), and parallel ( $B // +I$ ) to the current direction, respectively. The inset shows data (yellow points) taken under zero magnetic field. (b) Magnetic field dependence of the longitudinal resistance at 2 K under a perpendicular magnetic field. The peak positions ( $\pm 100$  Oe) correspond to the coercive field in the  $M-H$  curve of Fig. S1(d).

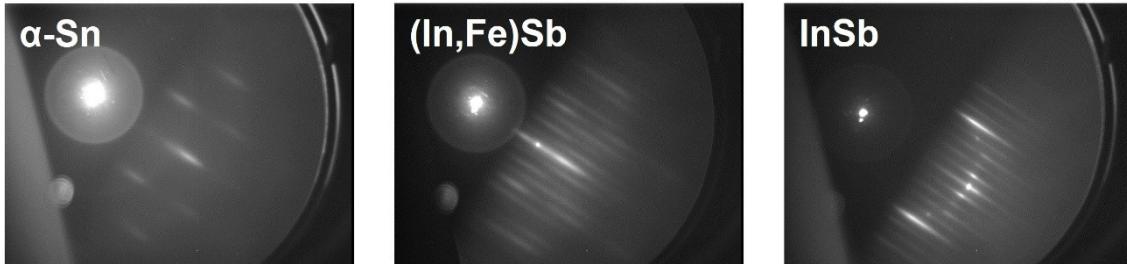

**Supplementary Fig. S3 | RHEED pattern of each layer during the MBE growth along the [110] direction.**

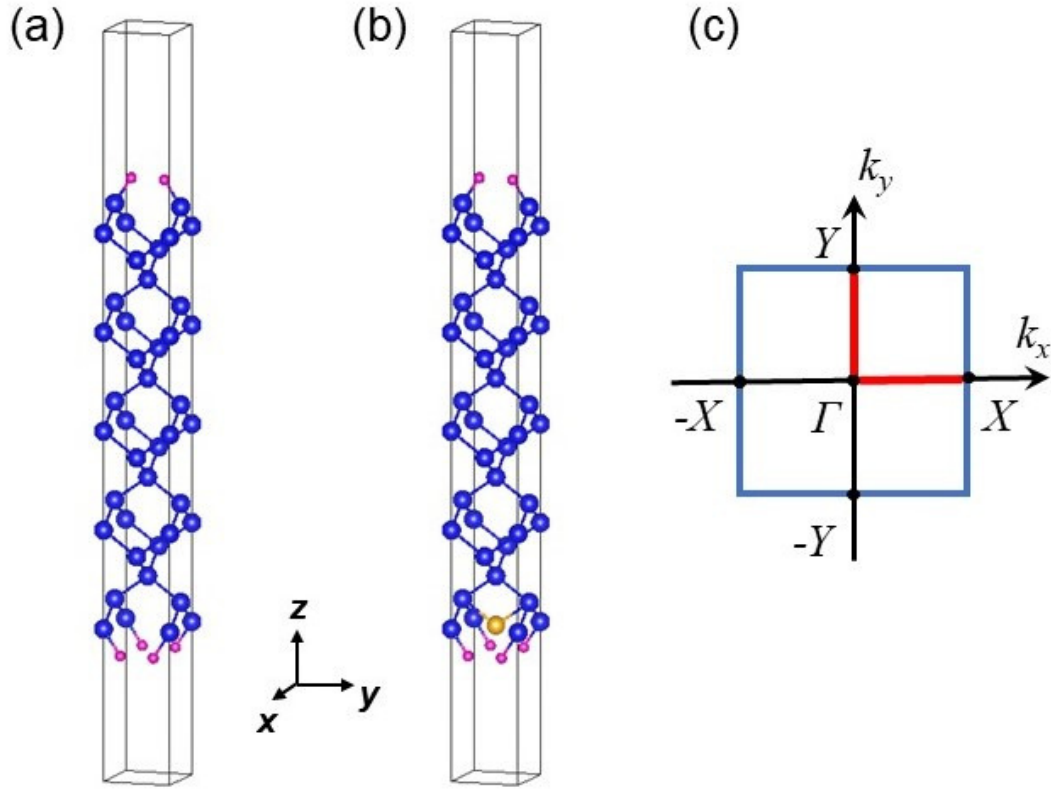

**Supplementary Fig. S4 | Crystal structures used in slab calculations.** (a) Slab geometry of  $\alpha$ -Sn/vacuum. (b) Slab geometry of  $\alpha$ -Sn/Fe along the [001] direction. Sn, Fe, and H atoms are represented by blue, yellow, and pink spheres, respectively. (c) Definition of the two-dimensional Brillouin zone in our calculation. Here,  $X = (\pi/a^*, 0)$  and  $Y = (0, \pi/a^*)$  are on the Brillouin zone boundary in the  $k_z = 0$  plane.  $a^* = a/\sqrt{2}$  is the in-plane lattice constant of the tetragonal unit cell of  $\alpha$ -Sn in our calculations, where  $a$  is the lattice constant of the diamond-type unit cell of  $\alpha$ -Sn.

## Supplementary note 1

We characterized the magnetic properties of our heterostructure sample using magnetic circular dichroism (MCD) spectroscopy and superconducting quantum interference device (SQUID) magnetometry. Supplementary Fig. S1(a) presents the MCD spectra measured at 5 K under magnetic fields of 1 T, 0.5 T, and 0.2 T, applied perpendicular to the film plane. The spectra obtained at 0.5 T and 0.2 T are normalized to that at 1 T. All the normalized spectra are almost perfectly overlapped, featuring a negative peak at 2.0 eV ( $E_1$ ) and a positive peak at 2.5 eV ( $E_1 + \Delta_1$ )—a spectral signature characteristic of the intrinsic ferromagnetism in (In,Fe)Sb<sup>S5</sup>. The magnetic field dependence of the MCD intensity ( $MCD-H$  curves), measured at a photon energy of 2.0 eV [Supplementary Fig. S1(b)], shows clear ferromagnetic hysteresis. From the Arrott plot analysis<sup>S6</sup>, the Curie temperature ( $T_C$ ) is estimated to be 300 K [Supplementary Fig. S1(c)]. SQUID magnetometry at 5 K [Supplementary Fig. S1(d)] reveals a coercive field of approximately 100 Oe, further confirming the ferromagnetic nature of the (In,Fe)Sb layer.

## Supplementary note 2

Supplementary Figure S2(a) shows the current ( $I$ ) dependence of the longitudinal resistance under a magnetic field of 1 T. For currents below 10  $\mu A$ , the resistance remains constant, indicating stable conduction behavior. However, when the current exceeds 10  $\mu A$ , the resistance decreases monotonically with increasing the current. This behavior is likely attributed to a change in the current distribution. At low current ( $I < 10 \mu A$ ), conduction predominantly occurs within the  $\alpha$ -Sn layer due to its semi-metallic nature. It is worth noting that the (In,Fe)Sb layer is insulating at low temperatures because of carrier localization induced by Fe 3d states<sup>S5</sup>. The observed resistance decrease at higher currents ( $I > 10 \mu A$ ) may be due to current leakage into the underlying InSb buffer layer, possibly penetrating through the nominally insulating (In,Fe)Sb.

All the transport measurements in this study were performed at  $I = 10 \mu A$ , ensuring that the current primarily flows through the  $\alpha$ -Sn layer. Under this condition, we also observe clear hysteresis in the magnetoresistance at 2 K [Supplementary Fig. S2(b)], with peaks at  $\pm 100$  Oe corresponding to the coercive field of approximately 100 Oe [Supplementary Fig. S1(d)]. This hysteresis indicates that the  $\alpha$ -Sn layer becomes magnetized via the adjacent ferromagnetic (In,Fe)Sb layer. Such a phenomenon, where the magnetic order of one material influences an adjacent layer through quantum mechanical coupling, is known as the magnetic proximity effect.

### Supplementary note 3

Here, we comment on the validity of comparing the resistance and current in the context of our measurements and theoretical model. In the experiment, a constant direct current  $I_{\text{DC}}$  is applied, and the voltage change upon magnetic field reversal is detected as the OMR signal:  $V_{\text{odd}}^{\text{exp.}} = R_{\text{odd}}^{\text{exp.}} \times I_{\text{DC}}$ . On the other hand, semiclassical transport theory—where the net current arises from a shift of a rigid Fermi surface—predicts a voltage signal proportional to the current density:  $V_{\text{odd}}^{\text{calc.}} \propto j_{\text{odd}}^{\text{calc.}}$ . Assuming that the experimentally observed voltage equals the theoretically calculated one,  $V_{\text{odd}}^{\text{exp.}} = V_{\text{odd}}^{\text{calc.}}$ , it follows that:  $R_{\text{odd}}^{\text{exp.}} \propto j_{\text{odd}}^{\text{calc.}}$ . This proportionality justifies the comparison between the experimentally measured OMR ratio and the theoretically calculated odd component of the current density.

### Supplementary note 4

For both the  $\alpha$ -Sn/vacuum and  $\alpha$ -Sn/Fe slab geometries, we used the layered tetragonal unit cell based on the diamond-type crystal structure deposited along the [001] direction, as shown in Supplementary Fig. S4. The 18 ML slab geometry was adopted for the computation of the topological surface state (TSS) of strained  $\alpha$ -Sn. Both edges of the slab were terminated with H atoms to remove dangling bonds. On the other hand, for the computation of a strained  $\alpha$ -Sn/Fe system, it was adopted that the 18 ML slab geometry in which a single Fe atom is embedded as a dopant on the lowest Sn layer. For both of the slab geometries, the surfaces were separated by a vacuum layer with a thickness of 20 Å. To calculate the strain effect on the topological electronic states, we considered a biaxial in-plane compressive strain of  $-0.76\%$ <sup>S7</sup>. Fixing the in-plane lattice constant, structural optimization of atomic position was performed.

### Supplementary References

- [S1]. Fujita, T. C., Kozuka, Y., Uchida, M., Tsukazaki, A., Arima, T., and Kawasaki, M., “Odd parity magnetoresistance in pyrochlore iridate thin films with broken time-reversal symmetry”, *Sci. Rep.* **5**, 9711 (2015).
- [S2]. Wang, Y., Lee, P. A., Silevitch, D., Gomez, F., Cooper, S., Ren, Y., Yan, J.-Q., Mandrus, D., Rosenbaum, T. and Feng, Y., “Antisymmetric linear magnetoresistance and the planar Hall effect” *Nature Commun.* **11**, 216 (2020).
- [S3]. Takiguchi, K., Anh, L. D., Chiba, T., Shiratani, H., Fukuzawa, R., Takahashi, T., and Tanaka, M., “Giant gate-controlled odd-parity magnetoresistance in one-dimensional channels with a magnetic proximity effect”, *Nature Commun.* **13**, 6538

(2022).

- [S4]. Sahani, D., Das, S., Watanabe, K., Taniguchi, T., Agarwal, A. and Bid, A., “Giant gate-controlled room temperature odd-parity magnetoresistance in magnetized bilayer graphene”, *Phys. Rev. Lett.* **134**, 106301 (2025).
- [S5]. Tu, N. T., Hai, P. N., Anh, L. D. and Tanaka, M., “High-temperature ferromagnetism in new n-type Fe-doped ferromagnetic semiconductor (In,Fe)Sb”, *Appl. Phys. Express* **11**, 063005 (2018).
- [S6]. Arrott, A., “Criterion for Ferromagnetism from Observation of Magnetic Isotherms”, *Phys. Rev.* **108**, 1394 (1957).
- [S7]. Anh, L. D., Takase, K., Chiba, T., Kota, Y., Takiguchi, K., and Tanaka, M., “Elemental Topological Dirac Semimetal  $\alpha$ -Sn with High Quantum Mobility”, *Adv. Mater.* **33**, 2104645 (2021).
